# Supplementary material for: Use of In Vitro and Predictive In Silico Models to Study the Inhibition of Cytochrome P4503A by Stilbenes
Source: PubMed Central journal article supplement (PMC4618141; doi:10.1371/journal.pone.0141061), 2015-10-20
Supplement: pone.0141061.s001.pdf [file pone.0141061.s001.pdf]

**Supplementary file PONE-D-15-21369**

**S1. Testosterone metabolism in Caco-2/TC7 cells (CYP3A4)**

Testosterone quantified based on HPLC-calibration

| Treatment                           | Repeat | Testosterone ( $\mu\text{g}$ ) |       |       |       | Averages            |       |       |       | S.E.                |       |       |       |
|-------------------------------------|--------|--------------------------------|-------|-------|-------|---------------------|-------|-------|-------|---------------------|-------|-------|-------|
|                                     |        | Incubation time (h)            |       |       |       | Incubation time (h) |       |       |       | Incubation time (h) |       |       |       |
|                                     |        | 0                              | 2     | 4     | 6     | 0                   | 2     | 4     | 6     | 0                   | 2     | 4     | 6     |
| Control                             | 1      | 1.331                          | 0.996 | 0.892 | 0.831 | 1.330               | 1.024 | 0.888 | 0.806 | 0.025               | 0.014 | 0.002 | 0.030 |
|                                     | 2      | 1.287                          | 1.042 | 0.886 | 0.840 |                     |       |       |       |                     |       |       |       |
|                                     | 3      | 1.374                          | 1.034 | 0.886 | 0.747 |                     |       |       |       |                     |       |       |       |
| Ketoconazole<br>[10 $\mu\text{M}$ ] | 1      | 1.331                          | 1.293 | 1.157 | 1.047 | 1.330               | 1.275 | 1.173 | 1.109 | 0.025               | 0.011 | 0.010 | 0.036 |
|                                     | 2      | 1.287                          | 1.255 | 1.192 | 1.109 |                     |       |       |       |                     |       |       |       |
|                                     | 3      | 1.374                          | 1.278 | 1.168 | 1.171 |                     |       |       |       |                     |       |       |       |
| Resveratrol<br>[2.5 $\mu\text{M}$ ] | 1      | 1.331                          | 1.095 | 1.043 | 1.004 | 1.330               | 1.099 | 1.039 | 0.992 | 0.025               | 0.002 | 0.004 | 0.006 |
|                                     | 2      | 1.287                          | 1.101 | 1.031 | 0.984 |                     |       |       |       |                     |       |       |       |
|                                     | 3      | 1.374                          | 1.100 | 1.041 | 0.987 |                     |       |       |       |                     |       |       |       |
| Resveratrol<br>[5 $\mu\text{M}$ ]   | 1      | 1.331                          | 1.104 | 1.015 | 1.009 | 1.330               | 1.097 | 1.015 | 0.992 | 0.025               | 0.008 | 0.003 | 0.009 |
|                                     | 2      | 1.287                          | 1.106 | 1.020 | 0.980 |                     |       |       |       |                     |       |       |       |
|                                     | 3      | 1.374                          | 1.080 | 1.009 | 0.987 |                     |       |       |       |                     |       |       |       |
| Resveratrol<br>[10 $\mu\text{M}$ ]  | 1      | 1.331                          | 1.285 | 1.131 | 1.124 | 1.330               | 1.289 | 1.136 | 1.129 | 0.025               | 0.002 | 0.008 | 0.007 |
|                                     | 2      | 1.287                          | 1.289 | 1.125 | 1.120 |                     |       |       |       |                     |       |       |       |
|                                     | 3      | 1.374                          | 1.291 | 1.152 | 1.143 |                     |       |       |       |                     |       |       |       |

| Treatment                                               | Repeat | Testosterone ( $\mu\text{g}$ ) |       |       |       | Averages            |       |       |       | S.E.                |       |       |       |
|---------------------------------------------------------|--------|--------------------------------|-------|-------|-------|---------------------|-------|-------|-------|---------------------|-------|-------|-------|
|                                                         |        | Incubation time (h)            |       |       |       | Incubation time (h) |       |       |       | Incubation time (h) |       |       |       |
|                                                         |        | 0                              | 2     | 4     | 6     | 0                   | 2     | 4     | 6     | 0                   | 2     | 4     | 6     |
| Control                                                 | 1      | 1.331                          | 0.996 | 0.892 | 0.831 | 1.330               | 1.024 | 0.888 | 0.806 | 0.025               | 0.014 | 0.002 | 0.030 |
|                                                         | 2      | 1.287                          | 1.042 | 0.886 | 0.840 |                     |       |       |       |                     |       |       |       |
|                                                         | 3      | 1.374                          | 1.034 | 0.886 | 0.747 |                     |       |       |       |                     |       |       |       |
| Ketoconazole<br>[10 $\mu\text{M}$ ]                     | 1      | 1.331                          | 1.293 | 1.157 | 1.047 | 1.330               | 1.275 | 1.173 | 1.109 | 0.025               | 0.011 | 0.010 | 0.036 |
|                                                         | 2      | 1.287                          | 1.255 | 1.192 | 1.109 |                     |       |       |       |                     |       |       |       |
|                                                         | 3      | 1.374                          | 1.278 | 1.168 | 1.171 |                     |       |       |       |                     |       |       |       |
| Resveratrol<br>aldehyde<br>(RA)<br>[2.5 $\mu\text{M}$ ] | 1      | 1.331                          | 1.115 | 0.948 | 0.881 | 1.330               | 1.133 | 0.963 | 0.841 | 0.025               | 0.010 | 0.012 | 0.020 |
|                                                         | 2      | 1.287                          | 1.149 | 0.955 | 0.829 |                     |       |       |       |                     |       |       |       |
|                                                         | 3      | 1.374                          | 1.135 | 0.986 | 0.814 |                     |       |       |       |                     |       |       |       |
| Resveratrol<br>aldehyde<br>(RA)<br>[5 $\mu\text{M}$ ]   | 1      | 1.331                          | 1.165 | 1.087 | 1.020 | 1.330               | 1.156 | 1.084 | 0.996 | 0.025               | 0.012 | 0.002 | 0.018 |
|                                                         | 2      | 1.287                          | 1.170 | 1.085 | 1.006 |                     |       |       |       |                     |       |       |       |
|                                                         | 3      | 1.374                          | 1.133 | 1.079 | 0.961 |                     |       |       |       |                     |       |       |       |
| Resveratrol<br>aldehyde<br>(RA)<br>[10 $\mu\text{M}$ ]  | 1      | 1.331                          | 1.206 | 1.045 | 0.982 | 1.330               | 1.260 | 1.041 | 0.972 | 0.025               | 0.045 | 0.002 | 0.011 |
|                                                         | 2      | 1.287                          | 1.350 | 1.037 | 0.950 |                     |       |       |       |                     |       |       |       |
|                                                         | 3      | 1.374                          | 1.225 | 1.041 | 0.983 |                     |       |       |       |                     |       |       |       |

| Res_Statistics- Tukey letters |                     |   |   |
|-------------------------------|---------------------|---|---|
| Treatment                     | Incubation time (h) |   |   |
|                               | 2                   | 4 | 6 |
| Control                       | A                   | A | A |
| Resveratrol [2.5 $\mu$ M]     | B                   | B | B |
| Resveratrol [5 $\mu$ M]       | B                   | B | B |
| Resveratrol [10 $\mu$ M]      | D                   | C | C |
| Ketoconazole [10 $\mu$ M]     | D                   | C | C |

| RA_Statistics- Tukey letters       |                     |     |     |
|------------------------------------|---------------------|-----|-----|
| Treatment                          | Incubation time (h) |     |     |
|                                    | 2                   | 4   | 6   |
| Control                            | A                   | A   | A   |
| Resveratrol aldehyde [2.5 $\mu$ M] | CD                  | ABC | AB  |
| Resveratrol aldehyde [5 $\mu$ M]   | CDE                 | DE  | CD  |
| Resveratrol aldehyde [10 $\mu$ M]  | F                   | CD  | BCD |
| Ketoconazole [10 $\mu$ M]          | F                   | EF  | DEF |
