# Supplementary material for: Use of In Vitro and Predictive In Silico Models to Study the Inhibition of Cytochrome P4503A by Stilbenes
Source: PubMed Central journal article supplement (PMC4618141; doi:10.1371/journal.pone.0141061), 2015-10-20
Supplement: pone.0141061.s002.pdf [file pone.0141061.s002.pdf]

**Supplementary file PONE-D-15-21369**

**S2. Testosterone metabolism in Rat Liver Microsomes (CYP3A4)**

| Compound     | Concentration (µM) | % of control | Average | S.E. |
|--------------|--------------------|--------------|---------|------|
| Control      | 0                  | 103.2647217  | 100.00  | 2.54 |
|              | 0                  | 101.7325935  |         |      |
|              | 0                  | 95.0026848   |         |      |
| Ketoconazole | 2.5                | 73.87506712  | 74.82   | 2.42 |
|              |                    | 79.40934312  |         |      |
|              |                    | 71.19026311  |         |      |
|              | 25                 | 37.78414176  | 33.06   | 2.41 |
|              |                    | 31.52675855  |         |      |
|              |                    | 29.88007875  |         |      |
|              | 50                 | 21.99749418  | 20.49   | 1.75 |
|              |                    | 17.01449794  |         |      |
|              |                    | 22.47001969  |         |      |
|              | 100                | 15.7615894   | 14.82   | 0.54 |
|              |                    | 14.82011813  |         |      |
|              |                    | 13.87864686  |         |      |
|              | 200                | 16.17683909  | 13.90   | 1.45 |
|              |                    | 14.32253445  |         |      |
|              |                    | 11.19384285  |         |      |
| Resveratrol  | 2                  | 103.83       | 106.69  | 1.66 |
|              |                    | 106.64       |         |      |
|              |                    | 109.60       |         |      |
|              | 5                  | 78.64        | 82.46   | 1.96 |
|              |                    | 83.67        |         |      |
|              |                    | 85.08        |         |      |
|              | 10                 | 70.65        | 71.07   | 0.74 |
|              |                    | 70.05        |         |      |
|              |                    | 72.51        |         |      |
|              | 25                 | 51.28        | 51.76   | 0.26 |
|              |                    | 52.16        |         |      |
|              |                    | 51.84        |         |      |
|              | 50                 | 48.18        | 48.25   | 0.89 |
|              |                    | 46.75        |         |      |
|              |                    | 49.82        |         |      |

| Keto- statistics |               |   |   |        |
|------------------|---------------|---|---|--------|
| Level            | Tukey-letters |   |   | Mean   |
| Control          | A             |   |   | 100.00 |
| Keto 2.5 µM      |               | B |   | 74.82  |
| Keto 25 µM       |               |   | C | 33.06  |
| Keto 50 µM       |               |   | D | 20.49  |
| Keto 100 µM      |               |   | D | 14.82  |
| Keto 200 µM      |               |   | D | 13.90  |

| Res- statistics |               |   |   |        |
|-----------------|---------------|---|---|--------|
| Level           | Tukey-letters |   |   | Mean   |
| Res 2 µM        | A             |   |   | 106.69 |
| Res 5 µM        |               | B |   | 82.46  |
| Res 10 µM       |               |   | C | 71.07  |
| Res 25 µM       |               |   | D | 51.76  |
| Res 50 µM       |               |   | D | 48.25  |

|                                      |     |        |        |      |
|--------------------------------------|-----|--------|--------|------|
| <b>Resveratrol<br/>Aldehyde (RA)</b> | 2   | 96.71  | 104.07 | 4.24 |
|                                      |     | 104.10 |        |      |
|                                      |     | 111.41 |        |      |
|                                      | 5   | 86.46  | 87.50  | 4.47 |
|                                      |     | 80.32  |        |      |
|                                      |     | 95.71  |        |      |
|                                      | 10  | 81.17  | 79.65  | 3.76 |
|                                      |     | 85.26  |        |      |
|                                      |     | 72.51  |        |      |
|                                      | 25  | 63.34  | 63.48  | 0.70 |
|                                      |     | 64.76  |        |      |
|                                      |     | 62.33  |        |      |
|                                      | 50  | 55.41  | 50.78  | 3.97 |
|                                      |     | 54.05  |        |      |
|                                      |     | 42.89  |        |      |
|                                      | 75  | 46.06  | 45.71  | 0.67 |
|                                      |     | 44.42  |        |      |
|                                      |     | 46.65  |        |      |
|                                      | 100 | 46.67  | 44.54  | 1.61 |
|                                      |     | 45.57  |        |      |
|                                      |     | 41.39  |        |      |

| RA- statistics |               |   |   |        |
|----------------|---------------|---|---|--------|
| Level          | Tukey-letters |   |   | Mean   |
| RA 2 $\mu$ M   | A             |   |   | 104.07 |
| RA 5 $\mu$ m   |               | B |   | 87.50  |
| RA 10 $\mu$ M  |               | B |   | 79.65  |
| RA 25 $\mu$ M  |               |   | C | 63.48  |
| RA 50 $\mu$ M  |               |   | C | 50.78  |
| RA 75 $\mu$ M  |               |   | D | 45.71  |
| RA 100 $\mu$ M |               |   | D | 44.54  |
